# Supplementary material for: Oxoberberine: a promising natural antioxidant in physiological environments
Source: Royal Society of Chemistry journal article supplement (doi:10.1039/d2ra01372j), 2022-01-01
Supplement: d2ra01372j1.pdf [file d2ra01372j1.pdf]

## Supporting Information (SI)

---

### **Oxoberberine: a promising natural antioxidant in physiological environments**

Pham Cam Nam,<sup>1</sup> Nguyen Quang Trung,<sup>2</sup> Nguyen Thi Hoa,<sup>3</sup> Huynh Ngoc Bich,<sup>3</sup> Tran Duc Manh,<sup>2</sup> Duong Tuan Quang,<sup>4</sup> Adam Mechler<sup>5</sup> and Quan V. Vo<sup>3\*</sup>

<sup>1</sup>Department of Chemical Engineering, The University of Danang-University of Science and Technology, Danang 550000, Vietnam

<sup>2</sup>The University of Danang-University of Science and Education, Da Nang 550000, Vietnam

<sup>3</sup>The University of Danang - University of Technology and Education, Danang 550000, Vietnam.

<sup>4</sup>Hue University, Hue 530000, Vietnam

<sup>5</sup>Department of Chemistry and Physics, La Trobe University, Victoria 3086, Australia.

\*Corresponding authors: [vvquan@ute.udn.vn](mailto:vvquan@ute.udn.vn)

### **Table of Contents**

|                                                                                                                                                                       |    |
|-----------------------------------------------------------------------------------------------------------------------------------------------------------------------|----|
| Table S1. The method to calculate rate constant following the conventional transition state theory .....                                                              | S2 |
| Table S2: The Cartesian coordinates and energies of TS of the reaction between compound OB with HOO <sup>•</sup> following the FHT mechanism in studied solvents..... | S4 |
| References .....                                                                                                                                                      | S8 |

**Table S1. The method to calculate rate constant following the conventional transition state theory**

The rate constant ( $k$ ) was calculated by using the conventional transition state theory (TST) (at 298.15 K, 1M standard state) according to the equation (1):<sup>1-5</sup>

$$k = \sigma \kappa \frac{k_B T}{h} e^{-(\Delta G^\ddagger)/RT} \quad (1)$$

Where:  $\sigma$  is the reaction symmetry number,<sup>6,7</sup>

$\kappa$  contains the tunneling corrections calculated using the Eckart barrier,<sup>8</sup>

$k_B$  is the Boltzmann constant,

$h$  is the Planck constant,

$\Delta G^\ddagger$  is the Gibbs free energy of activation.

The Marcus Theory was used to estimate the reaction barriers of SET reactions.<sup>9-12</sup> The free energy of reaction  $\Delta G^\ddagger$  for the SET pathway was computed following the equations (2,3).

$$\Delta G_{\text{SET}}^\ddagger = \frac{\lambda}{4} \left( 1 + \frac{\Delta G_{\text{SET}}^0}{\lambda} \right)^2 \quad (2)$$

$$\lambda \approx \Delta E_{\text{SET}} - \Delta G_{\text{SET}}^0 \quad (3)$$

where  $\Delta G_{\text{SET}}$  is the Gibbs energy of reaction,  $\Delta E_{\text{SET}}$  is the non-adiabatic energy difference between reactants and vertical products for SET.<sup>13,14</sup>

For rate constants that were close to the diffusion limit a correction was applied to yield realistic results<sup>15</sup>. The apparent rate constants ( $k_{\text{app}}$ ) were calculated following the Collins–Kimball theory in the solvents at 298.15K;<sup>16</sup> the steady-state Smoluchowski rate constant ( $k_D$ ) for an irreversible bimolecular diffusion–controlled reaction was calculated following the literature as corroding to equations (4,5).<sup>15,17</sup>

$$k_{\text{app}} = \frac{k_{\text{TST}} k_D}{k_{\text{TST}} + k_D} \quad (4)$$

$$k_D = 4\pi R_{AB} D_{AB} N_A \quad (5)$$

where  $R_{AB}$  is the reaction distance,  $N_A$  is the Avogadro constant, and  $D_{AB} = D_A + D_B$  ( $D_{AB}$  is the mutual diffusion coefficient of the reactants A and B),<sup>16,18</sup> where  $D_A$  or  $D_B$  is estimated using the Stokes–Einstein formulation (6).<sup>19,20</sup>

$$D_{A \text{ or } B} = \frac{k_B T}{6\pi\eta a_{A \text{ or } B}} \quad (6)$$

$\eta$  is the viscosity of the solvents (i.e.  $\eta(\text{H}_2\text{O}) = 8.91 \times 10^{-4}$  Pa s,  $\eta(\text{pentyl ethanoate}) = 8.62 \times 10^{-4}$  Pa s) and  $a$  is the radius of the solute.

The kinetic study requires different considerations. In this study, the solvent effects of water and pentyl ethanoate were modelled by the solvation model density (SMD) method<sup>21,22</sup>. Water (dielectric constants,  $\epsilon = 78.35$ ) and pentyl ethanoate ( $\epsilon = 4.73$ ) are the *de facto* standard solvents in the literature to mimic the polar and nonpolar environments in the human body<sup>15,23-25</sup>. Thus, these solvents were used to model the physiological environments. The solvent cage effects were included following the corrections proposed by Okuno,<sup>26</sup> adjusted with the free volume theory according to the Benson correction<sup>15,27-29</sup> to reduce over-penalizing entropy losses in solution. For the species that have multiple conformers, all of these were investigated and the conformer with the lowest electronic energy was included in the analysis.<sup>24,25</sup> The hindered internal rotation treatment was also applied to the single bonds to ensure that the obtained conformer has the lowest electronic energy<sup>25,30</sup>. All transition states were characterized by the existence of only one single imaginary frequency. Intrinsic coordinate calculations (IRCs) were performed to ensure that each transition state is connected correctly with the pre-complex and post-complex.

**Table S2: The Cartesian coordinates and energies of TS of the reaction between compound OB with HOO<sup>•</sup> following the FHT mechanism in studied solvents**

| Name                  | OB-C2-H-OOH (pentyl ethanoate) |             |             |                                                           |
|-----------------------|--------------------------------|-------------|-------------|-----------------------------------------------------------|
| Cartesian Coordinates | Frequency and Energy           |             |             |                                                           |
| C                     | 4.02297000                     | 0.31378500  | -0.62894000 | Zero-point correction= 0.397197 (Hartree/Particle)        |
| C                     | 3.47670800                     | -0.98530500 | -0.39582700 | Thermal correction to Energy= 0.422695                    |
| C                     | 2.12564400                     | -1.08457800 | -0.02635400 | Thermal correction to Enthalpy= 0.423639                  |
| C                     | 1.30390900                     | 0.02713500  | 0.07075600  | Thermal correction to Gibbs Free Energy= 0.341955         |
| C                     | 1.85891000                     | 1.29967800  | -0.17091600 | Sum of electronic and zero-point Energies= -1356.025847   |
| C                     | 3.20786800                     | 1.42839000  | -0.51387900 | Sum of electronic and thermal Energies= -1356.000349      |
| C                     | -0.17578300                    | -0.19038900 | 0.40406900  | Sum of electronic and thermal Enthalpies= -1355.999405    |
| N                     | -0.88942600                    | 1.10203600  | 0.42598800  | Sum of electronic and thermal Free Energies= -1356.081089 |
| C                     | -0.14491100                    | 2.25431500  | 0.91795400  |                                                           |
| C                     | 1.01374200                     | 2.53455000  | -0.02245400 |                                                           |
| C                     | -0.79132800                    | -1.03548900 | -0.72121300 |                                                           |
| C                     | -2.27903500                    | -1.15285500 | -0.55739800 |                                                           |
| C                     | -2.98434000                    | -0.02824900 | -0.10896700 |                                                           |
| C                     | -2.23553700                    | 1.23004200  | 0.21953200  |                                                           |
| C                     | -2.95480000                    | -2.33546300 | -0.83190400 |                                                           |
| C                     | -4.32903300                    | -2.43023900 | -0.64811600 |                                                           |
| C                     | -5.03187600                    | -1.32592100 | -0.19083100 |                                                           |
| C                     | -4.37138700                    | -0.11510300 | 0.06290700  |                                                           |
| O                     | -2.79979000                    | 2.31230600  | 0.30292400  |                                                           |
| O                     | 5.33882900                     | 0.34399800  | -0.92473400 |                                                           |
| C                     | 5.91229100                     | 1.59824200  | -1.29369400 |                                                           |
| O                     | 4.19803200                     | -2.06655400 | -0.57964000 |                                                           |
| O                     | -5.16407200                    | 0.88825800  | 0.54824300  |                                                           |
| C                     | -5.62060200                    | 1.80977000  | -0.45215400 |                                                           |
| O                     | -6.36762300                    | -1.41788900 | 0.01952900  |                                                           |
| C                     | -0.31688500                    | -0.87470400 | 1.77289600  |                                                           |
| H                     | 1.74900200                     | -2.08593000 | 0.15089600  |                                                           |
| H                     | 3.60674900                     | 2.42183900  | -0.67863400 |                                                           |
| H                     | -0.82634400                    | 3.09769700  | 0.97681000  |                                                           |
| H                     | 0.23163600                     | 2.03582900  | 1.92369100  |                                                           |
| H                     | 1.62362300                     | 3.35865000  | 0.35492900  |                                                           |
| H                     | 0.61919300                     | 2.83662100  | -0.99923000 |                                                           |
| H                     | -0.55385300                    | -0.55507200 | -1.67725100 |                                                           |
| H                     | -0.33661200                    | -2.02711700 | -0.72646800 |                                                           |
| H                     | -2.39846100                    | -3.19941200 | -1.17845200 |                                                           |
| H                     | -4.86254300                    | -3.35396100 | -0.83950600 |                                                           |
| H                     | 6.94758100                     | 1.38541900  | -1.54969800 |                                                           |
| H                     | 5.39490000                     | 2.01549600  | -2.16048800 |                                                           |
| H                     | 5.87635100                     | 2.30470900  | -0.46003300 |                                                           |
| H                     | 5.09077900                     | -2.07190900 | 0.08136000  |                                                           |
| H                     | -6.25269200                    | 2.53152100  | 0.06309300  |                                                           |
| H                     | -4.77333700                    | 2.32010000  | -0.90715700 |                                                           |
| H                     | -6.20547900                    | 1.28411000  | -1.21404500 |                                                           |
| H                     | -6.64852600                    | -0.60069200 | 0.45514400  |                                                           |
| H                     | 0.11463200                     | -0.24549700 | 2.55429500  |                                                           |
| H                     | -1.37055400                    | -1.04514000 | 2.00374900  |                                                           |
| H                     | 0.20001400                     | -1.83593000 | 1.78517800  |                                                           |
| H                     | 5.85057200                     | -0.11711200 | 1.06691100  |                                                           |
| O                     | 5.89803000                     | -1.97135800 | 1.05448900  |                                                           |
| O                     | 5.52537000                     | -0.81302800 | 1.66421300  |                                                           |

| Name                  |             |             |             | OB-C2-H-OOH (water)                          |                             |
|-----------------------|-------------|-------------|-------------|----------------------------------------------|-----------------------------|
| Cartesian Coordinates |             |             |             | Frequency and Energy                         |                             |
| C                     | 4.04355100  | 0.27687100  | -0.70037400 | Zero-point correction=                       | 0.396085 (Hartree/Particle) |
| C                     | 3.47840500  | -1.00874800 | -0.45468000 | Thermal correction to Energy=                | 0.421785                    |
| C                     | 2.13261200  | -1.10401400 | -0.08323500 | Thermal correction to Enthalpy=              | 0.422729                    |
| C                     | 1.32800900  | 0.02009800  | 0.01970200  | Thermal correction to Gibbs Free Energy=     | 0.340119                    |
| C                     | 1.90182000  | 1.28794600  | -0.21418200 | Sum of electronic and zero-point Energies=   | -1356.031279                |
| C                     | 3.24794600  | 1.40549100  | -0.56316600 | Sum of electronic and thermal Energies=      | -1356.005579                |
| C                     | -0.14958800 | -0.18204600 | 0.36520100  | Sum of electronic and thermal Enthalpies=    | -1356.004635                |
| N                     | -0.85835900 | 1.11834700  | 0.37801500  | Sum of electronic and thermal Free Energies= | -1356.087244                |
| C                     | -0.09745000 | 2.26668600  | 0.86660300  |                                              |                             |
| C                     | 1.07174700  | 2.53100300  | -0.06213600 |                                              |                             |
| C                     | -0.78004900 | -1.03963000 | -0.73970900 |                                              |                             |
| C                     | -2.26542500 | -1.14457300 | -0.55829600 |                                              |                             |
| C                     | -2.96006800 | -0.01734200 | -0.10158600 |                                              |                             |
| C                     | -2.20064700 | 1.23521500  | 0.21270400  |                                              |                             |
| C                     | -2.95142300 | -2.32225800 | -0.82999600 |                                              |                             |
| C                     | -4.32405700 | -2.40762300 | -0.63478200 |                                              |                             |
| C                     | -5.01578900 | -1.30031100 | -0.16762600 |                                              |                             |
| C                     | -4.34624000 | -0.09779700 | 0.08537300  |                                              |                             |
| O                     | -2.77273100 | 2.32480400  | 0.31617200  |                                              |                             |
| O                     | 5.34561500  | 0.27554000  | -1.03093800 |                                              |                             |
| C                     | 5.99645600  | 1.54088200  | -1.16880500 |                                              |                             |
| O                     | 4.22169800  | -2.10049500 | -0.61070300 |                                              |                             |
| O                     | -5.11811400 | 0.92870200  | 0.57523600  |                                              |                             |
| C                     | -5.66587500 | 1.76778700  | -0.45625600 |                                              |                             |
| O                     | -6.36102900 | -1.39590700 | 0.05205800  |                                              |                             |
| C                     | -0.28150700 | -0.84482400 | 1.74495600  |                                              |                             |
| H                     | 1.74562100  | -2.10013900 | 0.10064600  |                                              |                             |
| H                     | 3.65977700  | 2.39417900  | -0.72284300 |                                              |                             |
| H                     | -0.76011200 | 3.12405300  | 0.92080300  |                                              |                             |
| H                     | 0.26632200  | 2.04381600  | 1.87511700  |                                              |                             |
| H                     | 1.68922400  | 3.34173700  | 0.32966400  |                                              |                             |
| H                     | 0.69716700  | 2.84802800  | -1.04143300 |                                              |                             |
| H                     | -0.55177600 | -0.57925900 | -1.70733800 |                                              |                             |
| H                     | -0.33475300 | -2.03494000 | -0.73045800 |                                              |                             |
| H                     | -2.40251700 | -3.18808200 | -1.18258500 |                                              |                             |
| H                     | -4.86516000 | -3.32718900 | -0.82486900 |                                              |                             |
| H                     | 7.03521200  | 1.31476700  | -1.39443600 |                                              |                             |
| H                     | 5.55278900  | 2.11164600  | -1.98665200 |                                              |                             |
| H                     | 5.92949900  | 2.10431100  | -0.23548700 |                                              |                             |
| H                     | 5.02284700  | -2.08447400 | 0.10454000  |                                              |                             |
| H                     | -6.22869700 | 2.54968300  | 0.05001600  |                                              |                             |
| H                     | -4.86290000 | 2.20787800  | -1.04742000 |                                              |                             |
| H                     | -6.33274900 | 1.18713300  | -1.09939300 |                                              |                             |
| H                     | -6.66075900 | -0.58062500 | 0.48055500  |                                              |                             |
| H                     | 0.16880500  | -0.21064100 | 2.51119100  |                                              |                             |
| H                     | -1.33381000 | -1.00001000 | 1.99208100  |                                              |                             |
| H                     | 0.22356100  | -1.81197400 | 1.75510900  |                                              |                             |
| H                     | 5.60617700  | -0.02980600 | 1.43230500  |                                              |                             |
| O                     | 5.75912900  | -1.88070900 | 1.21403700  |                                              |                             |
| O                     | 5.14670300  | -0.81261000 | 1.78620400  |                                              |                             |
| Name                  |             |             |             | OB-C12-H-OOH (pentyl ethanoate)              |                             |
| Cartesian Coordinates |             |             |             | Frequency and Energy                         |                             |

|                       |             |             |             |                                              |                             |
|-----------------------|-------------|-------------|-------------|----------------------------------------------|-----------------------------|
| C                     | 5.04590700  | -0.18688700 | -0.06364800 | Zero-point correction=                       | 0.396708 (Hartree/Particle) |
| C                     | 4.35655200  | -1.37426700 | 0.23696600  | Thermal correction to Energy=                | 0.422380                    |
| C                     | 2.98843000  | -1.34827700 | 0.40290300  | Thermal correction to Enthalpy=              | 0.423325                    |
| C                     | 2.26481800  | -0.15197700 | 0.27482700  | Thermal correction to Gibbs Free Energy=     | 0.340884                    |
| C                     | 2.94934800  | 1.02574500  | -0.01418000 | Sum of electronic and zero-point Energies=   | -1356.027024                |
| C                     | 4.34283200  | 0.99747500  | -0.18135100 | Sum of electronic and thermal Energies=      | -1356.001352                |
| C                     | 0.74143900  | -0.22327700 | 0.41968900  | Sum of electronic and thermal Enthalpies=    | -1356.000408                |
| N                     | 0.14661900  | 1.11747000  | 0.23690900  | Sum of electronic and thermal Free Energies= | -1356.082848                |
| C                     | 0.93106300  | 2.26029200  | 0.69285200  |                                              |                             |
| C                     | 2.21449300  | 2.33855600  | -0.11276800 |                                              |                             |
| C                     | 0.20559000  | -1.12122300 | -0.70866200 |                                              |                             |
| C                     | -1.29094000 | -1.11116600 | -0.75425000 |                                              |                             |
| C                     | -1.94838600 | 0.08786900  | -0.45501600 |                                              |                             |
| C                     | -1.14199200 | 1.32107000  | -0.15752800 |                                              |                             |
| C                     | -2.02094400 | -2.26431600 | -1.07233700 |                                              |                             |
| C                     | -3.39717500 | -2.24453700 | -1.07400600 |                                              |                             |
| C                     | -4.09183500 | -1.05630200 | -0.76131200 |                                              |                             |
| C                     | -3.34354500 | 0.11471000  | -0.43614600 |                                              |                             |
| O                     | -1.62413200 | 2.43808800  | -0.28314400 |                                              |                             |
| O                     | 6.39018000  | -0.34202300 | -0.20115900 |                                              |                             |
| C                     | 7.15604600  | 0.81239500  | -0.51504300 |                                              |                             |
| O                     | 5.03790500  | -2.54148600 | 0.36508800  |                                              |                             |
| O                     | -4.04841600 | 1.20022000  | -0.01531600 |                                              |                             |
| C                     | -4.54508700 | 2.05336300  | -1.05934700 |                                              |                             |
| O                     | -5.39927700 | -1.01969200 | -0.79113000 |                                              |                             |
| C                     | 0.35528800  | -0.76327700 | 1.80598300  |                                              |                             |
| H                     | 2.49190600  | -2.28436800 | 0.63243100  |                                              |                             |
| H                     | 4.86094900  | 1.92490700  | -0.39641200 |                                              |                             |
| H                     | 0.32271400  | 3.15250900  | 0.57662200  |                                              |                             |
| H                     | 1.16368600  | 2.12726200  | 1.75547900  |                                              |                             |
| H                     | 2.84416400  | 3.14784000  | 0.26494500  |                                              |                             |
| H                     | 1.97158000  | 2.56906000  | -1.15567500 |                                              |                             |
| H                     | 0.60380900  | -0.74972300 | -1.66055300 |                                              |                             |
| H                     | 0.56654100  | -2.14201000 | -0.57618300 |                                              |                             |
| H                     | -1.48742200 | -3.17968500 | -1.30285800 |                                              |                             |
| H                     | -3.98071000 | -3.12737900 | -1.30761900 |                                              |                             |
| H                     | 8.18911200  | 0.47974800  | -0.58892100 |                                              |                             |
| H                     | 6.83934600  | 1.23953300  | -1.47038200 |                                              |                             |
| H                     | 7.06885900  | 1.56309600  | 0.27522700  |                                              |                             |
| H                     | 5.97522100  | -2.36025000 | 0.21626100  |                                              |                             |
| H                     | -5.11645200 | 2.83617600  | -0.56436900 |                                              |                             |
| H                     | -3.70480400 | 2.48992000  | -1.59851100 |                                              |                             |
| H                     | -5.19406000 | 1.48477200  | -1.72867800 |                                              |                             |
| H                     | -5.83848300 | -0.69361300 | 0.22930500  |                                              |                             |
| H                     | 0.73221300  | -0.09475000 | 2.58303900  |                                              |                             |
| H                     | -0.73099900 | -0.83120600 | 1.90232300  |                                              |                             |
| H                     | 0.77832300  | -1.75520700 | 1.97415400  |                                              |                             |
| H                     | -4.59903100 | 0.50613600  | 1.64978000  |                                              |                             |
| O                     | -6.11557200 | -0.53073000 | 1.39287100  |                                              |                             |
| O                     | -4.91746500 | -0.34448500 | 2.01109600  |                                              |                             |
| <b>Name</b>           |             |             |             | <b>OB-C12-H-OOH (water)</b>                  |                             |
| Cartesian Coordinates |             |             |             | Frequency and Energy                         |                             |
| C                     | 5.03391100  | -0.20406300 | -0.07282000 | Zero-point correction=                       | 0.395444 (Hartree/Particle) |
| C                     | 4.32910400  | -1.39165400 | 0.18045500  | Thermal correction to Energy=                | 0.421465                    |

|   |             |             |             |                                              |              |
|---|-------------|-------------|-------------|----------------------------------------------|--------------|
| C | 2.96080000  | -1.36168200 | 0.34218100  | Thermal correction to Enthalpy=              | 0.422409     |
| C | 2.24935300  | -0.15461200 | 0.25466200  | Thermal correction to Gibbs Free Energy=     | 0.338555     |
| C | 2.94801300  | 1.02555300  | 0.01227500  | Sum of electronic and zero-point Energies=   | -1356.027598 |
| C | 4.34143400  | 0.99054100  | -0.14953700 | Sum of electronic and thermal Energies=      | -1356.001577 |
| C | 0.72656600  | -0.21829100 | 0.39940000  | Sum of electronic and thermal Enthalpies=    | -1356.000633 |
| N | 0.14028800  | 1.13344000  | 0.23914000  | Sum of electronic and thermal Free Energies= | -1356.084488 |
| C | 0.93455100  | 2.25582900  | 0.73915200  |                                              |              |
| C | 2.22981700  | 2.34908400  | -0.04260600 |                                              |              |
| C | 0.17969000  | -1.09651400 | -0.73629000 |                                              |              |
| C | -1.31504500 | -1.07191200 | -0.77183900 |                                              |              |
| C | -1.96115100 | 0.13063900  | -0.46097300 |                                              |              |
| C | -1.13979700 | 1.34491100  | -0.14386100 |                                              |              |
| C | -2.05254400 | -2.21868300 | -1.09782600 |                                              |              |
| C | -3.42801200 | -2.19085500 | -1.08898500 |                                              |              |
| C | -4.10657000 | -1.00040700 | -0.76281400 |                                              |              |
| C | -3.35698600 | 0.16974500  | -0.44304100 |                                              |              |
| O | -1.61900900 | 2.47864200  | -0.24373300 |                                              |              |
| O | 6.38232400  | -0.35710700 | -0.21258800 |                                              |              |
| C | 7.14721800  | 0.81629200  | -0.47529200 |                                              |              |
| O | 4.99794400  | -2.58511100 | 0.27013000  |                                              |              |
| O | -4.05364200 | 1.26349200  | -0.03418600 |                                              |              |
| C | -4.62541900 | 2.04405400  | -1.10045100 |                                              |              |
| O | -5.42614300 | -0.96010800 | -0.76114400 |                                              |              |
| C | 0.34036000  | -0.77622800 | 1.77741300  |                                              |              |
| H | 2.45460000  | -2.30093900 | 0.53616100  |                                              |              |
| H | 4.86891700  | 1.92026900  | -0.32683500 |                                              |              |
| H | 0.34418000  | 3.16211200  | 0.65065500  |                                              |              |
| H | 1.14861900  | 2.08064100  | 1.79861800  |                                              |              |
| H | 2.86121500  | 3.13226700  | 0.38243800  |                                              |              |
| H | 2.01259200  | 2.62829600  | -1.07869400 |                                              |              |
| H | 0.57110300  | -0.72008500 | -1.68880900 |                                              |              |
| H | 0.52930800  | -2.12206500 | -0.61478500 |                                              |              |
| H | -1.52341500 | -3.13345600 | -1.33835400 |                                              |              |
| H | -4.01838700 | -3.06896900 | -1.32256000 |                                              |              |
| H | 8.18006200  | 0.48762100  | -0.56192100 |                                              |              |
| H | 6.82701600  | 1.28216800  | -1.41005200 |                                              |              |
| H | 7.05340000  | 1.52864100  | 0.34762600  |                                              |              |
| H | 5.94129700  | -2.42160000 | 0.13193200  |                                              |              |
| H | -5.16208300 | 2.86026700  | -0.62225100 |                                              |              |
| H | -3.82845500 | 2.43828100  | -1.73224500 |                                              |              |
| H | -5.31391900 | 1.43504200  | -1.68770800 |                                              |              |
| H | -5.80039500 | -0.70913700 | 0.25889900  |                                              |              |
| H | 0.73265200  | -0.12946400 | 2.56478500  |                                              |              |
| H | -0.74641700 | -0.82968800 | 1.87779900  |                                              |              |
| H | 0.75002000  | -1.77810700 | 1.91496900  |                                              |              |
| H | -4.41192000 | 0.35998500  | 1.84857700  |                                              |              |
| O | -5.96685100 | -0.61467500 | 1.51299900  |                                              |              |
| O | -4.69759400 | -0.56096300 | 1.99884100  |                                              |              |

## References

1. M. G. Evans and M. Polanyi, *Trans. Faraday Soc.*, 1935, **31**, 875-894.
2. H. Eyring, *J. Chem. Phys.*, 1935, **3**, 107-115.
3. D. G. Truhlar, W. L. Hase and J. T. Hynes, *J. Phys. Chem.*, 1983, **87**, 2664-2682.
4. T. Furuncuoglu, I. Ugur, I. Degirmenci and V. Aviyente, *Macromolecules*, 2010, **43**, 1823-1835.
5. E. Vélez, J. Quijano, R. Notario, E. Pabón, J. Murillo, J. Leal, E. Zapata and G. Alarcón, *J. Phys. Org. Chem.*, 2009, **22**, 971-977.
6. E. Pollak and P. Pechukas, *J. Am. Chem. Soc.*, 1978, **100**, 2984-2991.
7. A. Fernández-Ramos, B. A. Ellingson, R. Meana-Pañeda, J. M. Marques and D. G. Truhlar, *Theor. Chem. Acc.*, 2007, **118**, 813-826.
8. C. Eckart, *Phy. Rev.*, 1930, **35**, 1303.
9. R. A. Marcus, *Annu. Rev. Phys. Chem.*, 1964, **15**, 155-196.
10. R. A. Marcus, *Rev. Mod. Phys.*, 1993, **65**, 599.
11. Y. Lu, A. Wang, P. Shi and H. Zhang, *PloS one*, 2017, **12**, e0169773.
12. Y. Lu, A. Wang, P. Shi, H. Zhang and Z. Li, *PloS one*, 2015, **10**, e0133259.
13. S. F. Nelsen, S. C. Blackstock and Y. Kim, *J. Am. Chem. Soc.*, 1987, **109**, 677-682.
14. S. F. Nelsen, M. N. Weaver, Y. Luo, J. R. Pladziewicz, L. K. Ausman, T. L. Jentzsch and J. J. O'Konek, *J. Phys. Chem. A*, 2006, **110**, 11665-11676.
15. A. Galano and J. R. Alvarez-Idaboy, *J. Comput. Chem.*, 2013, **34**, 2430-2445.
16. F. C. Collins and G. E. Kimball, *J. Colloid Sci.*, 1949, **4**, 425-437.
17. M. Von Smoluchowski, *Z. Phys. Chem*, 1917, **92**, 129-168.
18. D. G. Truhlar, *J. Chem. Educ.*, 1985, **62**, 104.
19. A. Einstein, *Ann. Phys.*, 1905, **17**, 549-560.
20. G. G. Stokes, *Mathematical and Physical Papers*, University Press, Cambridge, 1905.
21. A. V. Marenich, C. J. Cramer and D. G. Truhlar, *The Journal of Physical Chemistry B*, 2009, **113**, 6378-6396.
22. C. P. Kelly, C. J. Cramer and D. G. Truhlar, *Journal of chemical theory and computation*, 2005, **1**, 1133-1152.
23. A. Galano and J. Raúl Alvarez-Idaboy, *Int. J. Quantum Chem.*, 2019, **119**, e25665.
24. Q. V. Vo, T. V. Gon, M. V. Bay and A. Mechler, *J. Phys. Chem. B*, 2019, **123**, 10672-10679.
25. Q. V. Vo and A. Mechler, *J. Chem. Inf. Model.*, 2020, **60**, 316-321.
26. Y. Okuno, *Chem.: Eur. J.*, 1997, **3**, 212-218.
27. S. Benson, *The foundations of chemical kinetics:*, Malabar, Florida, 1982.
28. C. Iuga, J. R. Alvarez-Idaboy and A. Vivier-Bunge, *J. Phys. Chem. B*, 2011, **115**, 12234-12246.



29. J. R. Alvarez-Idaboy, L. Reyes and N. Mora-Diez, *Org. Biomol. Chem.*, 2007, **5**, 3682-3689.
30. T. H. Le, T. T. Tran and L. K. Huynh, *Chemom. Intell. Lab. Syst.*, 2018, **172**, 10-16.
